# Supplementary material
Source: PubMed Central journal article supplement (PMC5042876)
Supplement: NIHMS816197-supplement-Supporting_Information.pdf [file NIHMS816197-supplement-Supporting_Information.pdf]

## ***Supporting Information***

# **The Cytochrome P450-Catalyzed Oxidative Rearrangement in the Final Step of Pentalenolactone Biosynthesis: Substrate Structure Determines Mechanism**

*Lian Duan,<sup>†</sup> Gerwald Jogl,<sup>#,\*</sup> and David E. Cane<sup>†,#,\*</sup>*

<sup>†</sup>Department of Chemistry, Brown University, Box H, Providence, Rhode Island

02912-9108, USA

<sup>#</sup>Department of Molecular Biology, Cell Biology and Biochemistry, Brown University,

Providence, Rhode Island 02912, USA

\*To whom correspondence should be addressed:

David E. Cane, Department of Chemistry, Brown University, Box H, Providence, Rhode  
Island 02912-9108, USA;

Gerwald Jogl, Department of Molecular Biology, Cell Biology and Biochemistry, Brown  
University, Providence, Rhode Island 02912, USA

## Table of Contents

|                                                                                                                                              |       |
|----------------------------------------------------------------------------------------------------------------------------------------------|-------|
| <b>Table S1.</b> Data collection and refinement statistics for substrate-free PntM and PntM complexed with <b>2</b> , <b>7</b> , or <b>1</b> | p S3  |
| <b>Table S2.</b> Data collection and refinement statistics PntM mutants complexed with <b>2</b>                                              | p S4  |
| <b>Table S3.</b> Primer pairs for site-directed mutagenesis                                                                                  | p S5  |
| <b>Table S4.</b> Predicted MW and HR-LC-ESI-MS observed $M_D$ of PntM and mutants                                                            | p S5  |
| <b>Figure S1.</b> SDS-PAGE analysis of PntM and mutants                                                                                      | p S6  |
| <b>Figure S2.</b> $^1\text{H}$ and $^{13}\text{C}$ NMR of 6,7-dihydropentalenolactone F methyl ester ( <b>7-Me</b> )                         | p S7  |
| <b>Figure S3.</b> EI-MS of 6,7-dihydropentalenolactone F methyl ester ( <b>7-Me</b> )                                                        | p S8  |
| <b>Figure S4.</b> UV difference spectra for titration of PntM with <b>2</b> and <b>7</b>                                                     | p S8  |
| <b>Figure S5.</b> UV difference spectra for titration of PntM mutants with <b>2</b>                                                          | p S9  |
| <b>Figure S6.</b> UV difference ( $A_{390}$ ) vs concentration of <b>2</b> for wild-type PntM and mutants                                    | p S10 |
| <b>Figure S7.</b> GC-MS calibration plot for pentalenolactone methyl ester ( <b>1-Me</b> )                                                   | p S11 |
| <b>Figure S8.</b> Steady-state kinetic analysis of conversion of <b>2</b> to <b>1</b> catalyzed by PntM and mutants                          | p S12 |
| <b>Figure S9.</b> BLAST comparisons                                                                                                          | p S13 |
| <b>Figure S10.</b> Pairwise comparisons of the structures of PntM with bound ligands                                                         | p S14 |
| <b>Figure S11.</b> Structures of PntM mutants                                                                                                | p S16 |

**Table S1.** Data collection and refinement statistics for substrate-free PntM and PntM complexed with **2**, **7**, or **1**.

|                                                     | <b>PntM</b>                         | <b>PntM + 2</b>                     | <b>PntM + 7</b>                     | <b>PntM + 1</b>                     |
|-----------------------------------------------------|-------------------------------------|-------------------------------------|-------------------------------------|-------------------------------------|
| PDB entry                                           | 5L1R                                | 5L1O                                | 5L1Q                                | 5L1P                                |
| <b>Data collection<sup>1</sup></b>                  |                                     |                                     |                                     |                                     |
| Space group                                         | P 2 <sub>1</sub> 2 <sub>1</sub> 2   |
| Cell dimensions                                     |                                     |                                     |                                     |                                     |
| <i>a</i> , <i>b</i> , <i>c</i> (Å)                  | 44.46, 164.59, 83.30                | 44.75, 164.48, 83.29                | 44.53, 164.37, 82.04                | 44.33, 163.76, 81.34                |
| $\alpha$ , $\beta$ , $\gamma$ (°)                   | 90, 90, 90                          | 90, 90, 90                          | 90, 90, 90                          | 90, 90, 90                          |
| Resolution (Å) <sup>2</sup>                         | 45.65 - 2.00 (2.05 - 2.00)          | 45.79 - 2.03 (2.08 - 2.03)          | 45.56 - 2.03 (2.08 - 2.03)          | 45.33 - 2.28 (2.36 - 2.28)          |
| <i>CC</i> 1/2                                       | 0.999 (0.935)                       | 0.996 (0.893)                       | 0.992 (0.624)                       | 0.983 (0.647)                       |
| <i>I</i> / $\gamma$                                 | 20.2 (6.0)                          | 15.5 (4.7)                          | 8.7 (2.2)                           | 6.4 (2.0)                           |
| Completeness (%)                                    | 99.1 (90.9)                         | 98.8 (91.5)                         | 99.8 (97.2)                         | 100.0 (100.0)                       |
| Redundancy                                          | 6.9 (4.6)                           | 7.1 (5.4)                           | 6.9 (5.0)                           | 7.2 (7.2)                           |
| <b>Refinement</b>                                   |                                     |                                     |                                     |                                     |
| Resolution (Å)                                      | 45.65 – 2.00 (2.071 -2.00)          | 43.18 – 2.03 (2.103 -2.03)          | 45.56 – 2.03 (2.103 -2.03)          | 42.79 – 2.28 (2.361 -2.28)          |
| No. reflections                                     | 41436 (3736)                        | 40100 (3663)                        | 39781 (3818)                        | 27902 (2748)                        |
| <i>R</i> <sub>work</sub> / <i>R</i> <sub>free</sub> | 0.1441 (0.1716)/<br>0.1731 (0.2201) | 0.1430 (0.1711)/<br>0.1776 (0.2175) | 0.1598 (0.2261)<br>/0.1903 (0.2710) | 0.1776 (0.2372)<br>/0.2221 (0.3191) |
| No. atoms                                           | 3790                                | 3848                                | 3663                                | 3476                                |
| macromolecules                                      | 3117                                | 3146                                | 3119                                | 3130                                |
| Ligands                                             | 54                                  | 63                                  | 63                                  | 63                                  |
| ions/water                                          | 619                                 | 639                                 | 481                                 | 283                                 |
| <i>B</i> -factors                                   | 20.32                               | 20.03                               | 22.45                               | 27.13                               |
| macromolecules                                      | 17.56                               | 17.55                               | 20.69                               | 26.55                               |
| Ligands                                             | 16.40                               | 10.64                               | 13.79                               | 20.13                               |
| ions/water                                          | 34.55                               | 33.16                               | 35.01                               | 35.10                               |
| R.m.s deviation                                     |                                     |                                     |                                     |                                     |
| Bond lengths (Å)                                    | 0.007                               | 0.008                               | 0.008                               | 0.008                               |
| Bond angles (°)                                     | 1.24                                | 1.20                                | 1.20                                | 1.28                                |
| Ramachandran plot                                   |                                     |                                     |                                     |                                     |
| Favored (%)                                         | 98                                  | 99                                  | 98                                  | 97                                  |
| Outliers (%)                                        | 0                                   | 0                                   | 0                                   | 0                                   |

1. One crystal was used for this dataset. 2. Highest resolution shell is shown in parenthesis.

**Table S2.** Data collection and refinement statistics PntM mutants complexed with **2**.

|                                                     | <b>PntM-F232L</b>                    | <b>PntM-M77S</b>                     | <b>PntM-M81A</b>                     | <b>PntM-M81C</b>                     | <b>PntM-M81C-BME</b>                 |
|-----------------------------------------------------|--------------------------------------|--------------------------------------|--------------------------------------|--------------------------------------|--------------------------------------|
| PDB entry                                           | 5L1S                                 | 5L1T                                 | 5L1U                                 | 5L1V                                 | 5L1W                                 |
| <b>Data collection<sup>1</sup></b>                  |                                      |                                      |                                      |                                      |                                      |
| Space group                                         | P 2 <sub>1</sub> 2 <sub>1</sub> 2    |
| Cell dimensions                                     |                                      |                                      |                                      |                                      |                                      |
| <i>a</i> , <i>b</i> , <i>c</i> (Å)                  | 44.60, 164.15,<br>82.54              | 44.68, 164.60,<br>83.51              | 44.62, 163.86,<br>82.22              | 44.56, 164.23,<br>82.97              | 44.57, 163.23,<br>83.29              |
| $\alpha$ , $\beta$ , $\gamma$ (°)                   | 90, 90, 90                           | 90, 90, 90                           | 90, 90, 90                           | 90, 90, 90                           | 90, 90, 90                           |
| Resolution (Å) <sup>2</sup>                         | 45.60 - 2.08<br>(2.13 - 2.08)        | 45.85 - 2.08<br>(2.14 - 2.08)        | 45.50 - 2.07<br>(2.13 - 2.07)        | 45.69 - 2.12<br>(2.18 - 2.12)        | 44.57 - 2.06 (2.12<br>- 2.06)        |
| <i>CC</i> 1/2                                       | 0.993 (0.724)                        | 0.982 (0.618)                        | 0.995 (0.809)                        | 0.987 (0.702)                        | 0.995 (0.821)                        |
| <i>I</i> / $\gamma$                                 | 11.0 (2.9)                           | 9.7 (2.1)                            | 12.2 (3.5)                           | 7.5 (2.2)                            | 13.6 (4.4)                           |
| Completeness (%)                                    | 98.6 (92.1)                          | 98.2 (90.4)                          | 98.7 (91.3)                          | 100.0 (100.0)                        | 97.2 (92.0)                          |
| Redundancy                                          | 7.1 (4.8)                            | 7.0 (4.8)                            | 7.1 (4.7)                            | 7.2 (7.1)                            | 7.3 (6.5)                            |
| <b>Refinement</b>                                   |                                      |                                      |                                      |                                      |                                      |
| Resolution (Å)                                      | 41.27 - 2.076<br>(2.15 - 2.076)      | 41.75 - 2.082<br>(2.157 - 2.081)     | 43.06 - 2.074<br>(2.148 - 2.074)     | 43.01 - 2.12<br>(2.196 - 2.12)       | 41.64 - 2.06<br>(2.134 - 2.06)       |
| No. reflections                                     | 36872 (3507)                         | 37605 (3436)                         | 36997 (3426)                         | 35477 (3450)                         | 37401 (3510)                         |
| <i>R</i> <sub>work</sub> / <i>R</i> <sub>free</sub> | 0.1540 (0.2072) /<br>0.1924 (0.2644) | 0.1599 (0.2417) /<br>0.1951 (0.2796) | 0.1541 (0.1972) /<br>0.1845 (0.2416) | 0.1604 (0.2271) /<br>0.1956 (0.2731) | 0.1613 (0.1953) /<br>0.1855 (0.2203) |
| No. atoms                                           | 3689                                 | 3711                                 | 3700                                 | 3733                                 | 3822                                 |
| macromolecules                                      | 3143                                 | 3136                                 | 3146                                 | 3119                                 | 3128                                 |
| ligands                                             | 63                                   | 63                                   | 63                                   | 63                                   | 63                                   |
| ions/water                                          | 483                                  | 502                                  | 491                                  | 551                                  | 631                                  |
| <i>B</i> -factors                                   | 21.14                                | 20.77                                | 19.42                                | 22.93                                | 18.89                                |
| macromolecules                                      | 19.79                                | 19.36                                | 17.83                                | 20.90                                | 16.49                                |
| ligands                                             | 12.05                                | 12.82                                | 10.90                                | 15.11                                | 10.62                                |
| ions/water                                          | 31.13                                | 30.38                                | 30.70                                | 35.30                                | 31.61                                |
| R.m.s deviations                                    |                                      |                                      |                                      |                                      |                                      |
| Bond lengths (Å)                                    | 0.009                                | 0.009                                | 0.008                                | 0.008                                | 0.006                                |
| Bond angles (°)                                     | 1.24                                 | 1.24                                 | 1.24                                 | 1.23                                 | 1.15                                 |
| Ramachandran plot                                   |                                      |                                      |                                      |                                      |                                      |
| Favored (%)                                         | 98                                   | 98                                   | 98                                   | 98                                   | 98                                   |
| Outliers (%)                                        | 0                                    | 0                                    | 0                                    | 0                                    | 0                                    |

1. One crystal was used for this dataset. 2. Highest resolution shell is shown in parenthesis.



**Table S3.** Primer pairs for site-directed mutagenesis

|       | Forward Primer (5' - 3')                              | Reverse Primer (5' - 3')                              |
|-------|-------------------------------------------------------|-------------------------------------------------------|
| F232G | GCC GTG CTG TTG <u>GCC</u> GGC<br>TAT GAA ACG ACC     | GGT CGT TTC ATA GCC <u>GCC</u><br>CAA CAG CAC GGC     |
| F232A | GCC GTG CTG TTG <u>GCC</u> GGC<br>TAT GAA ACG ACC     | GGT CGT TTC ATA GCC <u>GCC</u><br>CAA CAG CAC GGC     |
| F232Y | GCC GTG CTG TTG <u>TAC</u> GGC<br>TAT GAA ACG ACC     | GGT CGT TTC ATA GCC <u>GTA</u><br>CAA CAG CAC GGC     |
| F232L | GCC GTG CTG TTG <u>CTG</u> GGC<br>TAT GAA ACG ACC     | GGT CGT TTC ATA GCC <u>CAG</u><br>CAA CAG CAC GGC     |
| F232H | GCC GTG CTG TTG <u>GAT</u> GGC<br>TAT GAA ACG ACC     | GGT CGT TTC ATA GCC <u>ATC</u> CAA<br>CAG CAC GGC     |
| M81A  | GTA GTG GCT CTG <u>GCC</u> GGC<br>GGT GAT GAC         | GTC ATC ACC GGC <u>GCC</u> CAG<br>AGC CAC CAT         |
| M81C  | GTA GTG GCT CTG <u>TGC</u> GGC<br>GGT GAT GAC         | GTC ATC ACC GGC <u>GCA</u> CAG<br>AGC CAC CAT         |
| M77S  | GCT GCG CGT GCT TTC <u>AGC</u><br>GTG GCT CTG ATG GCC | GGC CAT CAG AGC CAC <u>TCG</u><br>GAA AGC ACG CGC AGC |

**Table S4.** Predicted MW and HR-LC-ESI-MS observed  $M_D$  of PntM and mutants

| Protein  | Observed $M_D$ (MH <sup>+</sup> ) | Calculated MW |
|----------|-----------------------------------|---------------|
| PntM     | 44445.27                          | 44444.87      |
| F232A    | 44369.80                          | 44368.77      |
| F232G    | 44355.86                          | 44354.74      |
| F232L    | 44412.67                          | 44410.85      |
| F232H    | 44436.51                          | 44434.83      |
| M81C     | 44418.39                          | 44416.18      |
| M81C-BME | 44494.37                          | 44492.31      |
| M77S     | 44401.20                          | 44400.75      |

The calculated MW is based on protein with an N-terminal Gly-Ser-His remaining after thrombin cleavage of the N-terminal His<sub>6</sub>-tag.

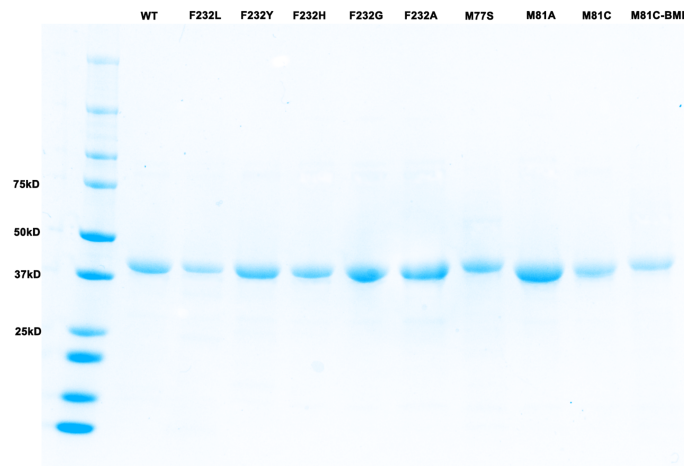

**Figure S1.** SDS-PAGE analysis of PntM and mutants after removal of N-terminal His<sub>6</sub>-tag.

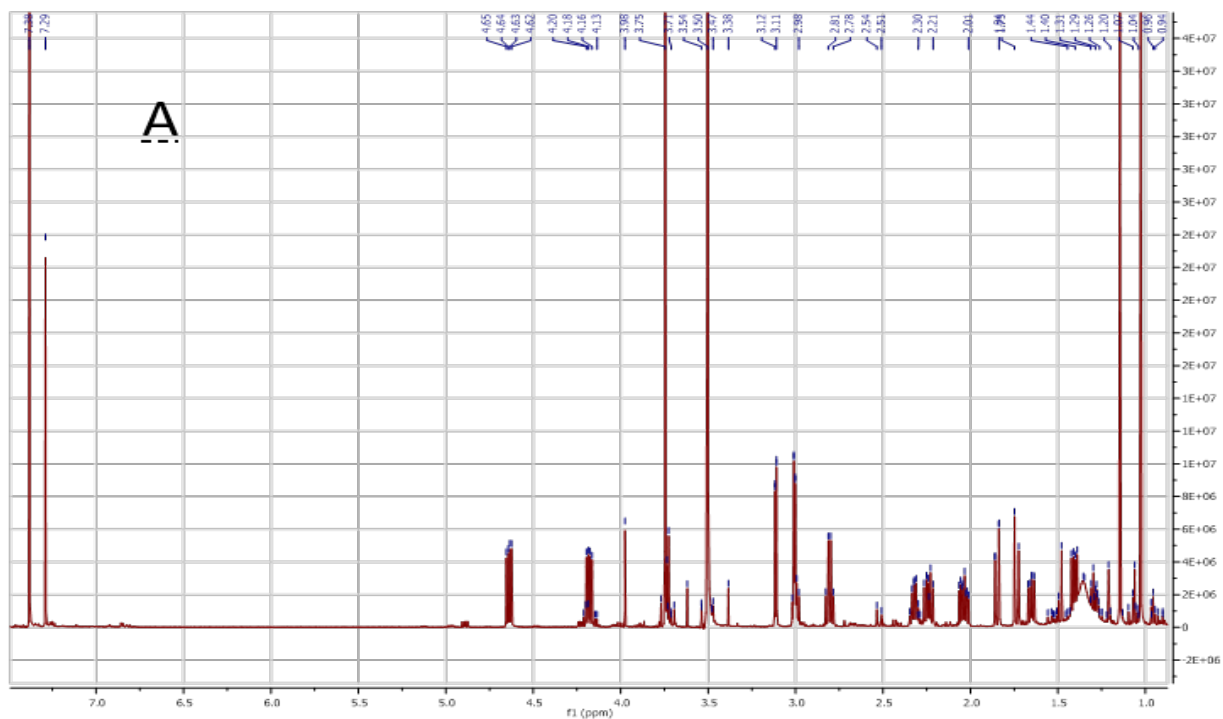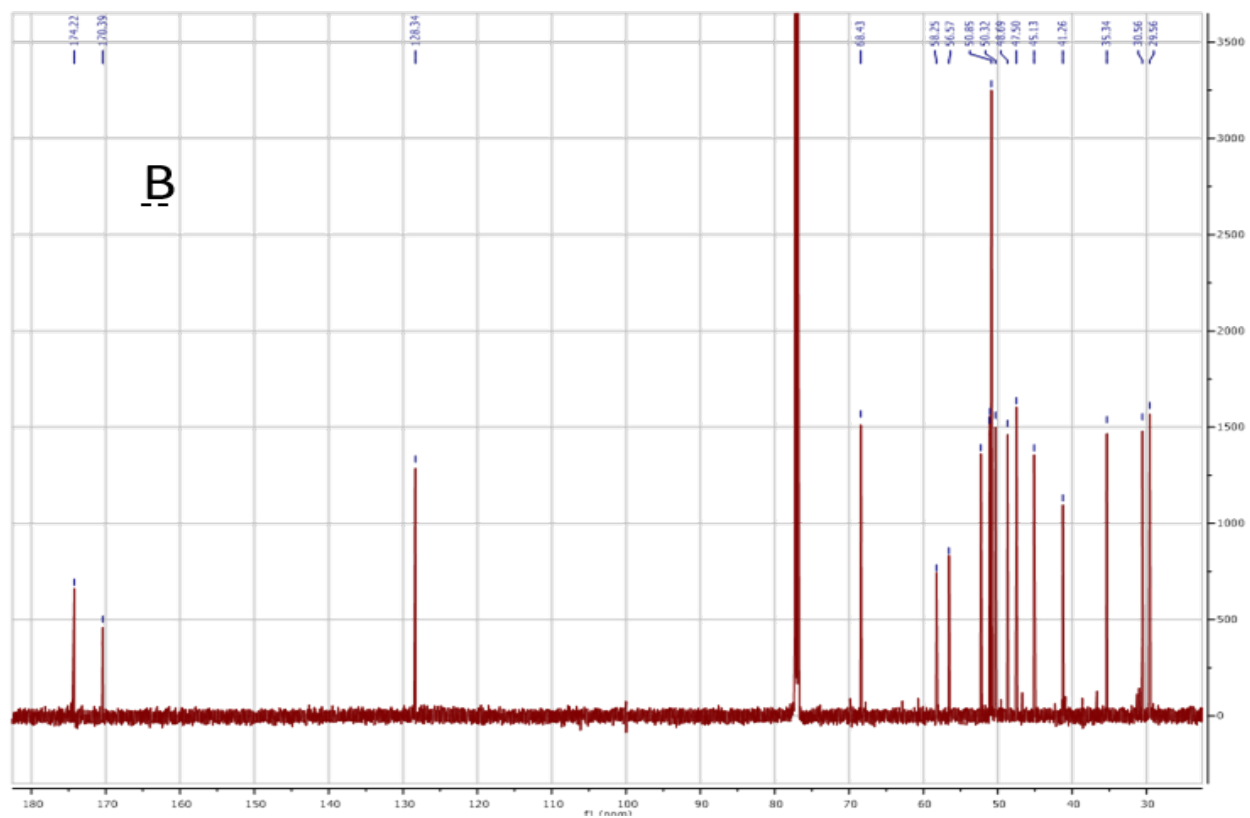

**Figure S2.** 6,7-Dihydropentalenolactone F methyl ester (**7-Me**). a)  $^1\text{H}$  NMR (400 MHz,  $\text{CDCl}_3$ ); b)  $^{13}\text{C}$  NMR (100 MHz,  $\text{CDCl}_3$ ).

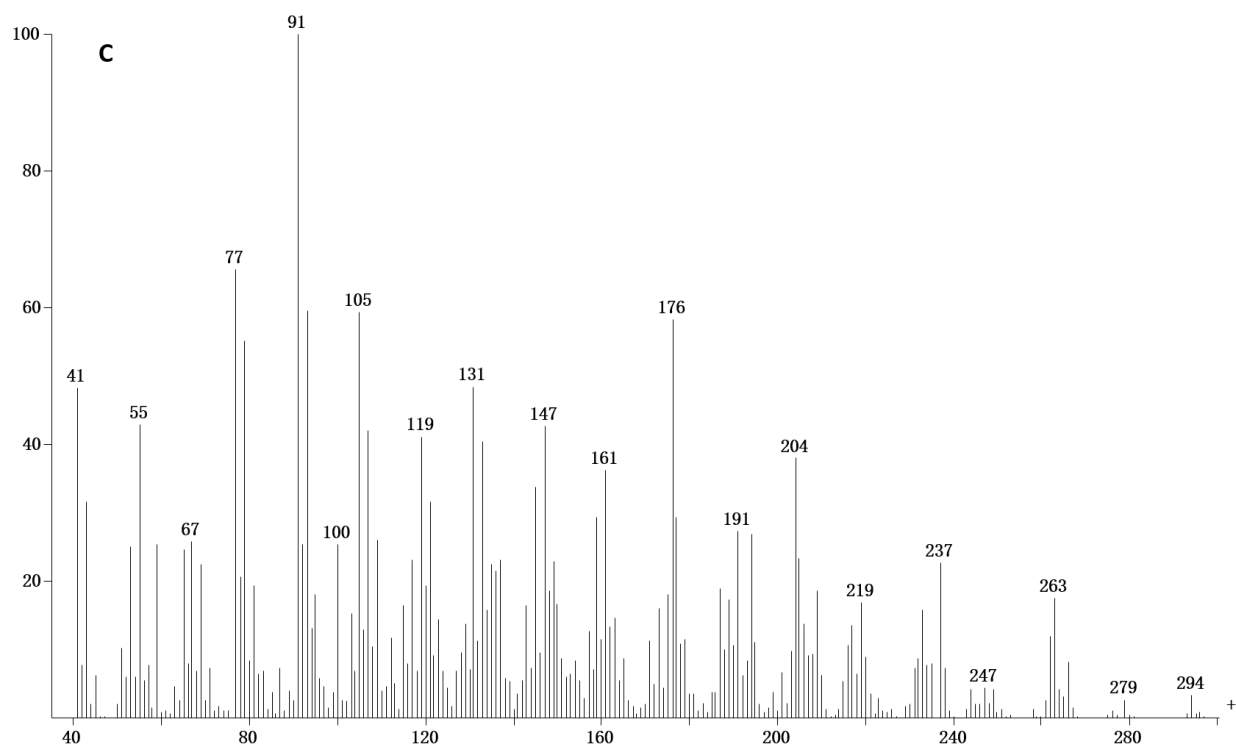

**Figure S3.** 6,7-Dihydropentalenolactone F methyl ester (**7-Me**), EI-MS

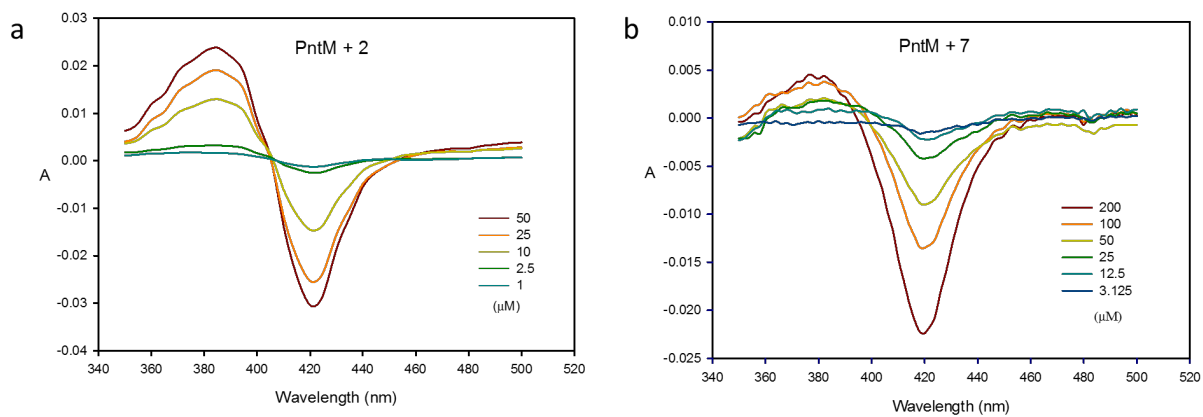

**Figure S4.** Titration of PntM, UV difference spectra. a) Pentalenolactone F (**2**); b) 6,7-Dihydropentalenolactone F (**7**).

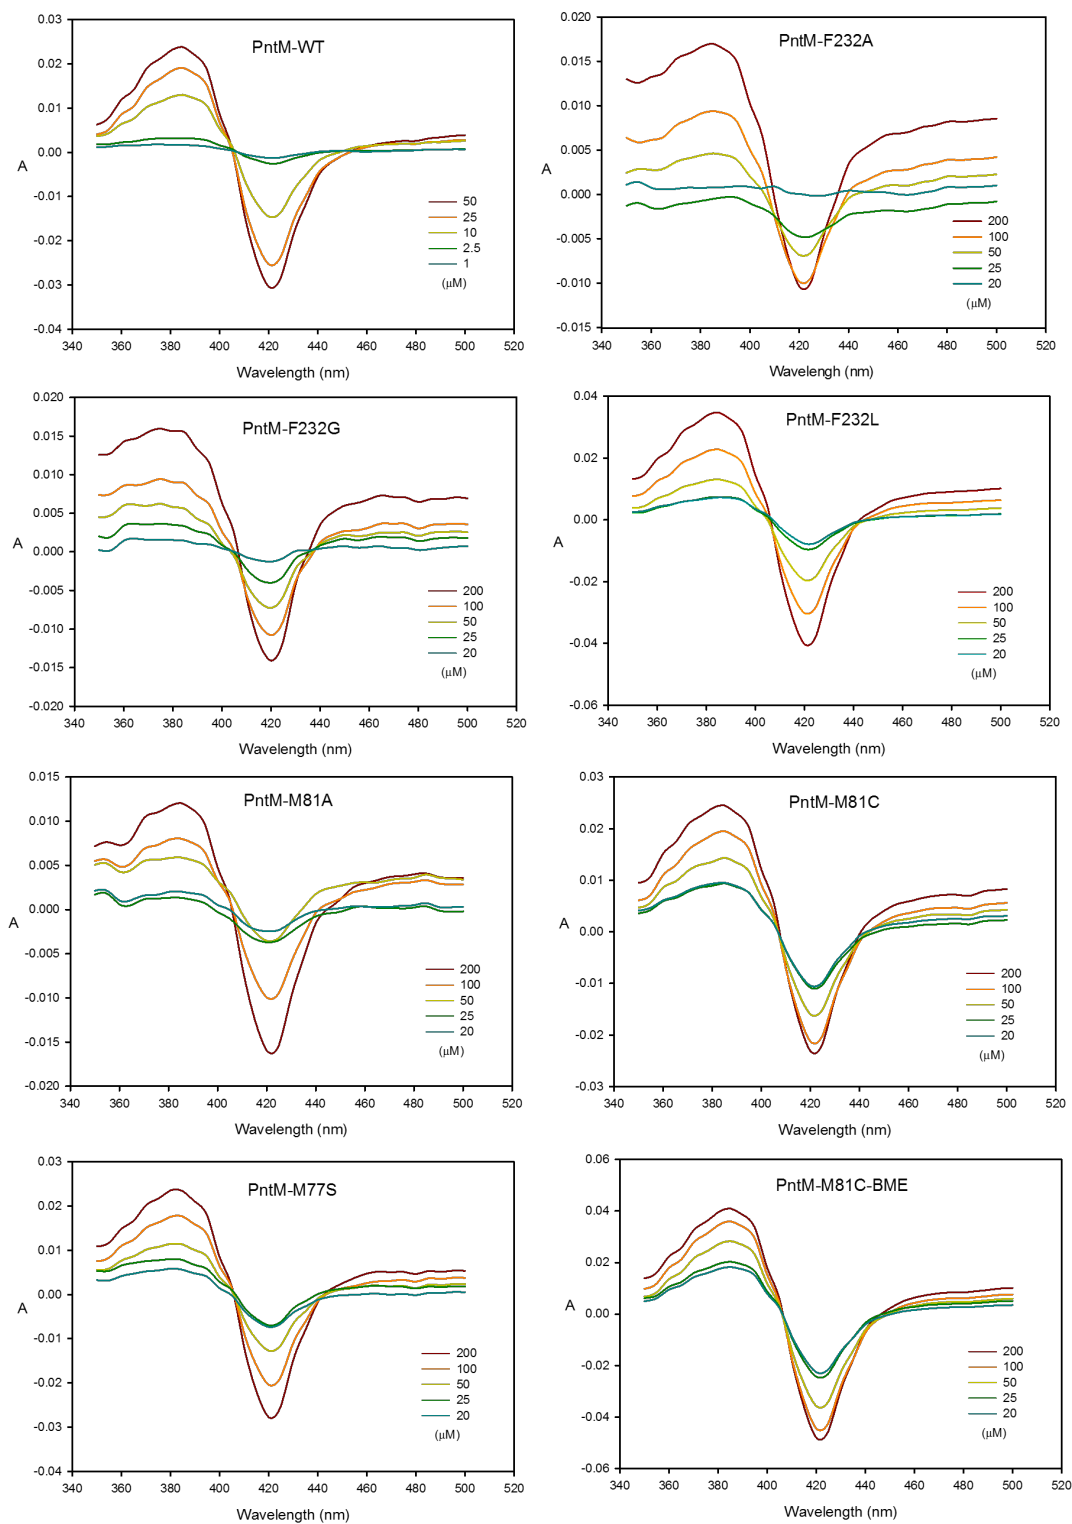

**Figure S5.** Titration of PntM mutants with pentalenolactone F (**2**), UV difference spectra.

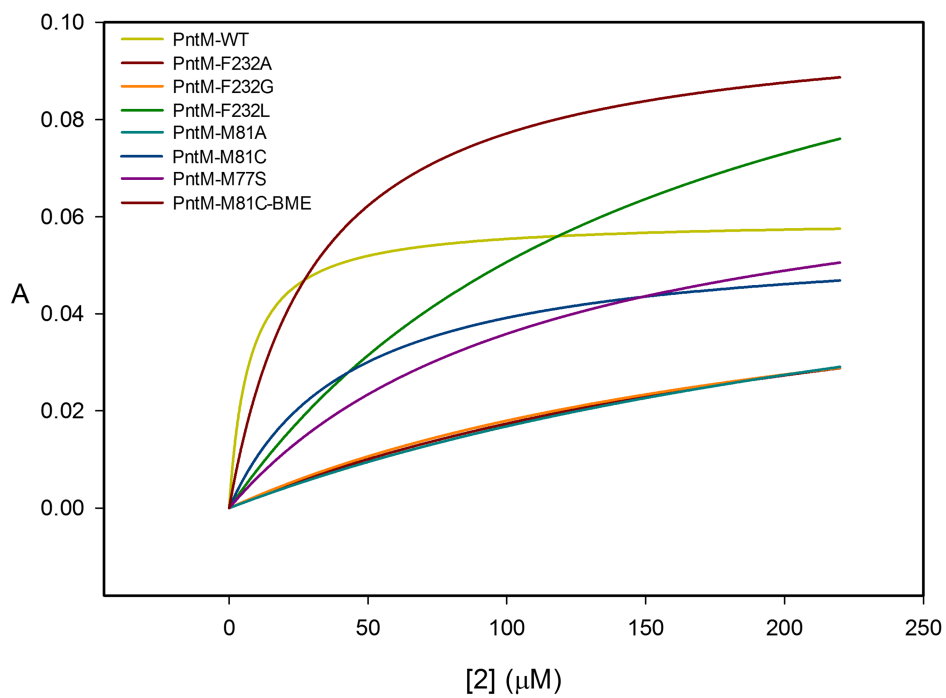

**Figure S6.** Plots of UV difference ( $A_{390}$ ) vs concentration of **2** for wild-type PntM and mutants.

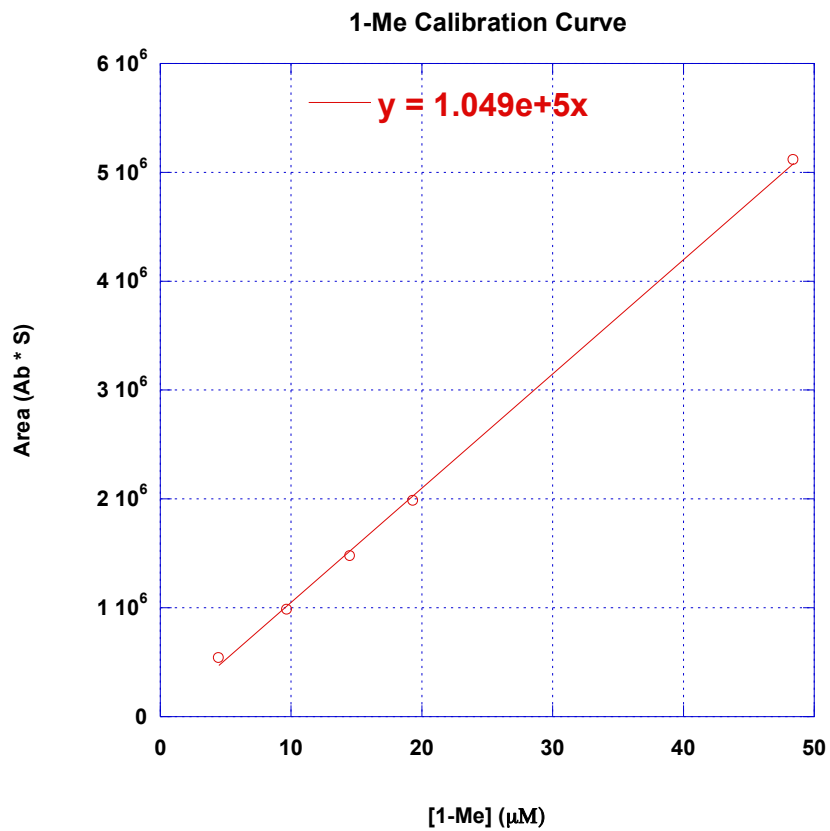

**Figure S7.** GC-MS calibration plot for pentalenolactone methyl ester (**1-Me**).

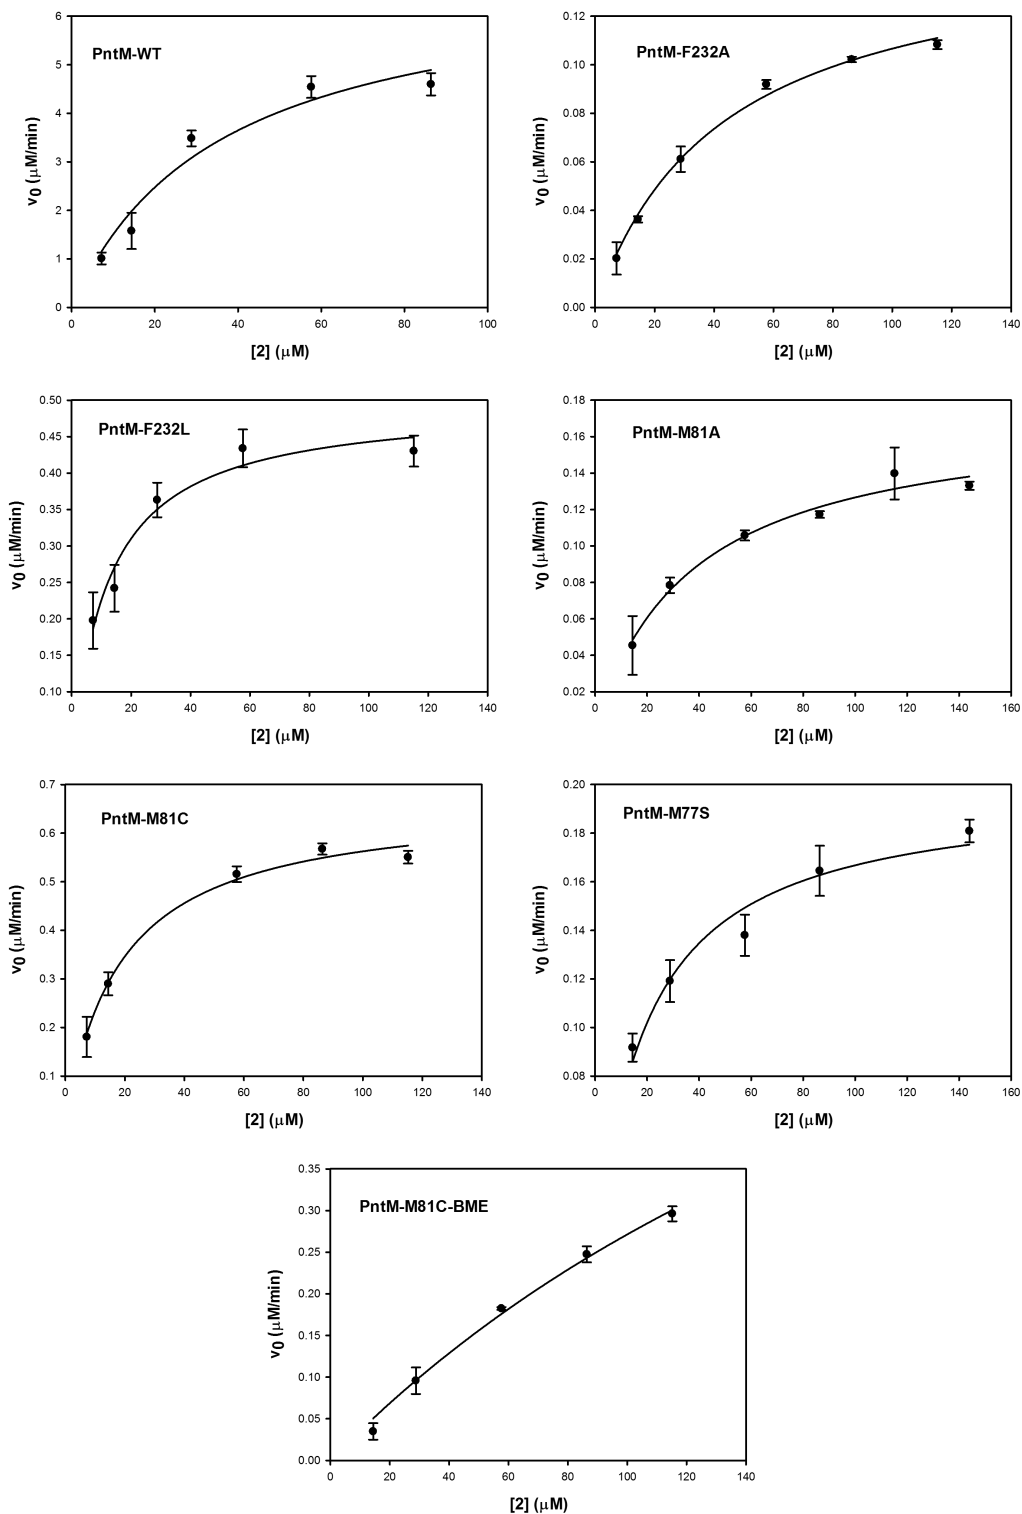

**Figure S8.** Steady-state kinetic analysis of conversion of **2** to **1** catalyzed by PntM and mutants.



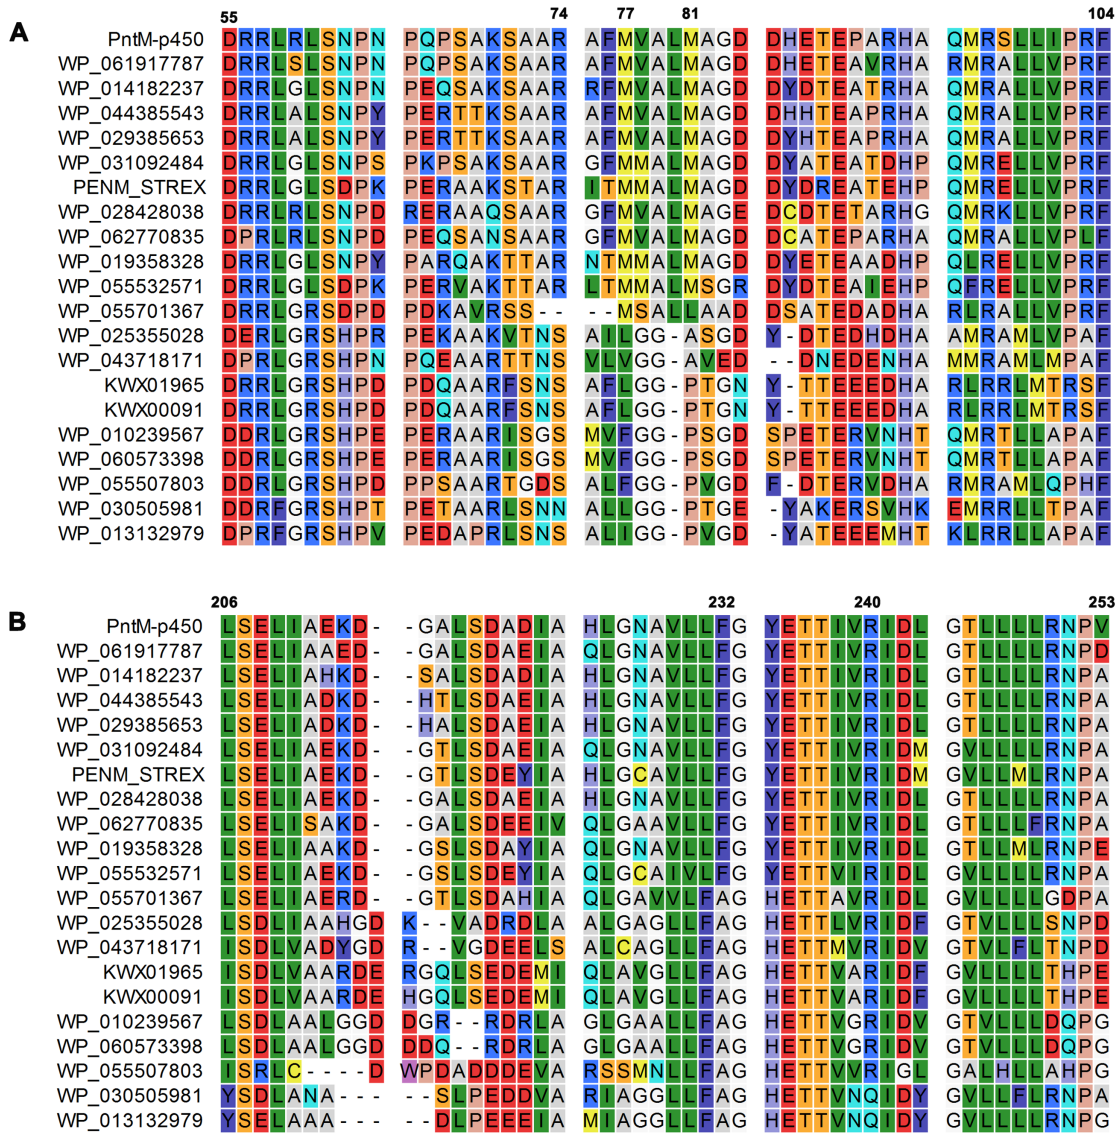

**Figure S9.** BLAST comparison of selected regions of PntM with top 20 matches. A) D55-F104, including key active site residues R74, M77, and M81. B) L206-V253, including key active site residues F232, T236, and R240

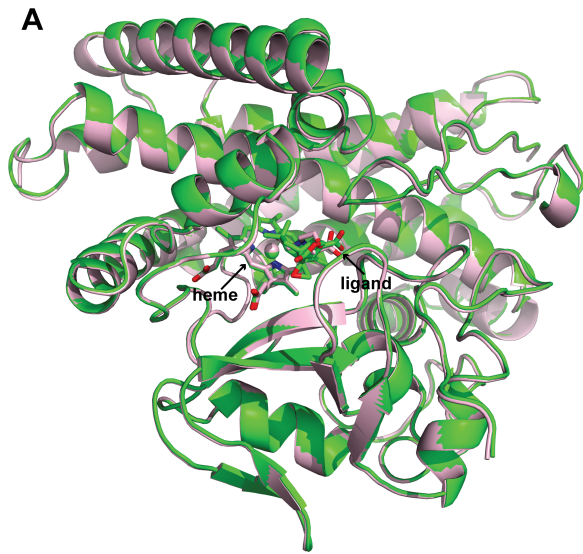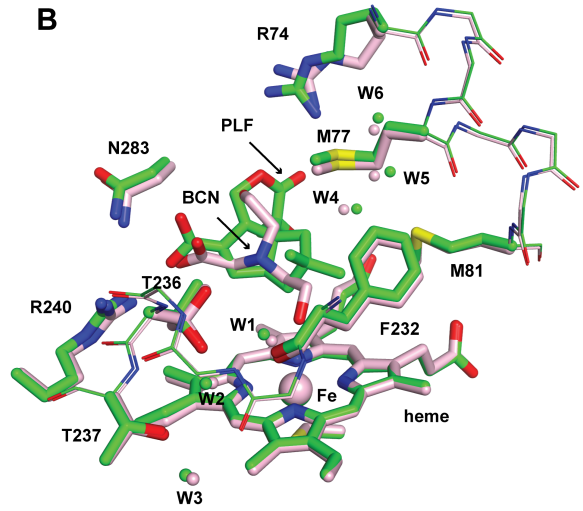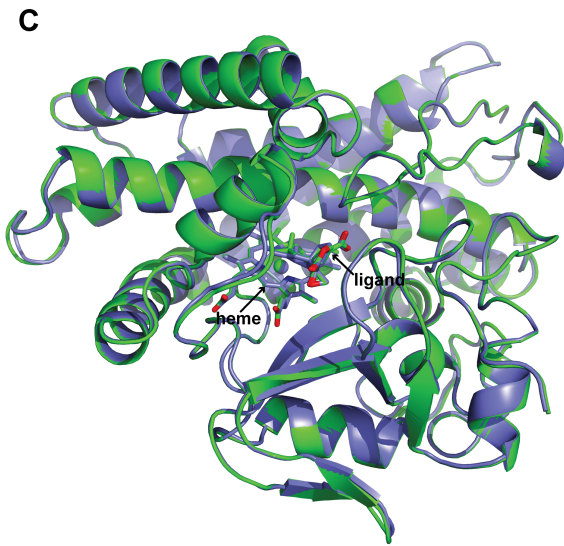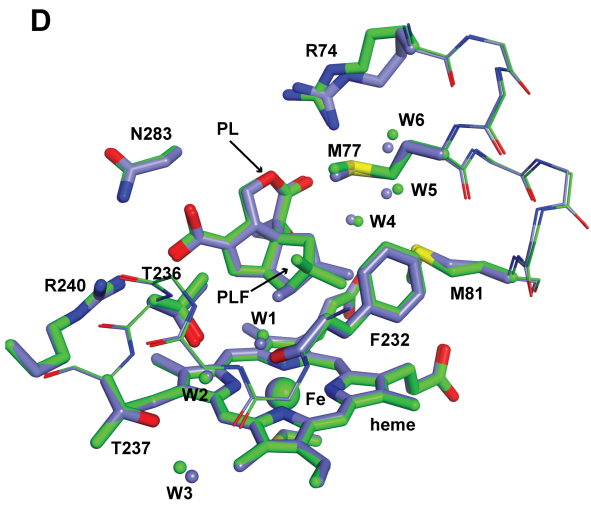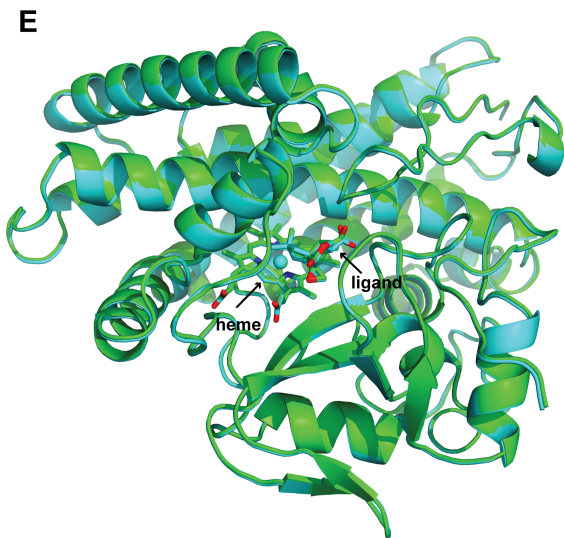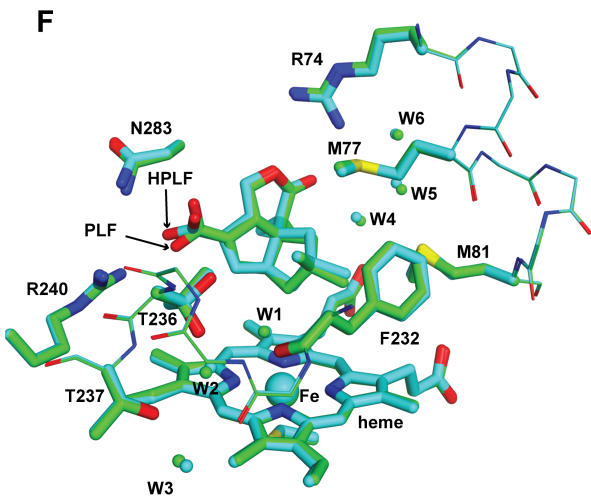

**Figure S10.** Comparison of the structures of PntM with bound ligands. **A**, Alignment and comparison of the overview structures of PntM with bound bicine and PntM with bound substrate **2**. PntM with bound bicine is shown in light pink and PntM with bound **2** is shown in green, heme is shown as, heme  $\text{Fe}^{+3}$  is shown as a sphere and ligands are shown as sticks. **B**, comparison of the active site regions of PntM with bound bicine and PntM with bound **2**. The relevant residues and water molecules of PntM with bound bicine are shown in light pink, while the relevant residues and water molecules of PntM with bound **2** are shown in green. **C**, comparison of the overview structures of PntM with bound product **1** (shown in slate ) and PntM with bound substrate **2**. **D**, comparison of the active site region of PntM with bound **1** and PntM with bound **2**. **E**, comparison of the overview structures of PntM with bound substrate **7** (shown in cyan) and PntM with bound substrate **2**. **F**, comparison of the active site region of PntM with bound **7** and PntM with bound **2**.

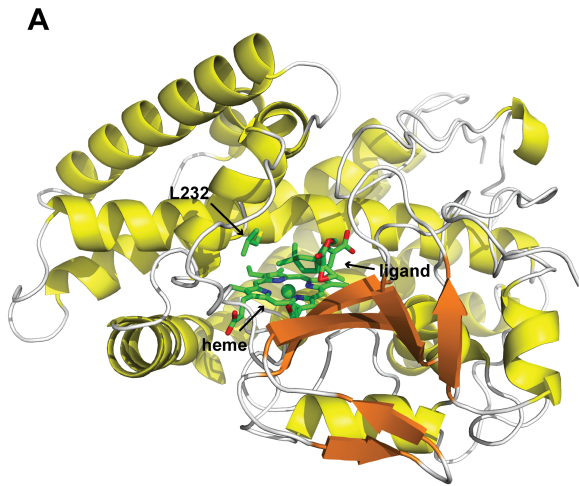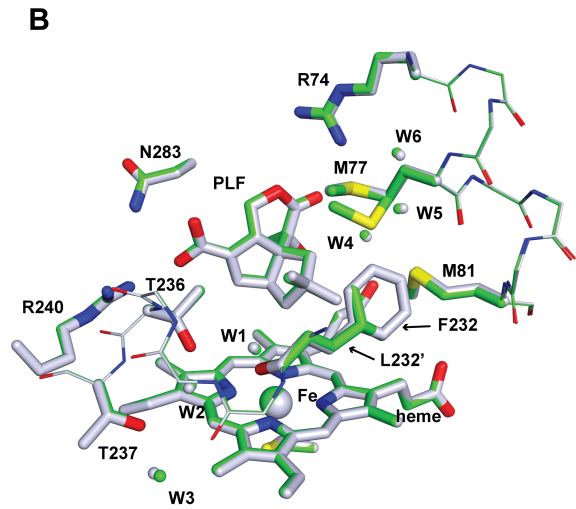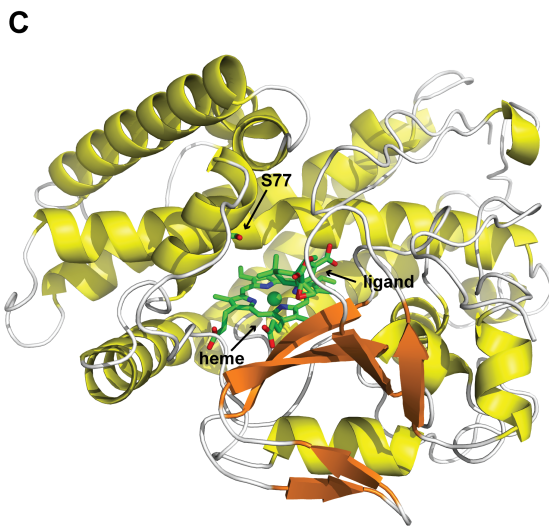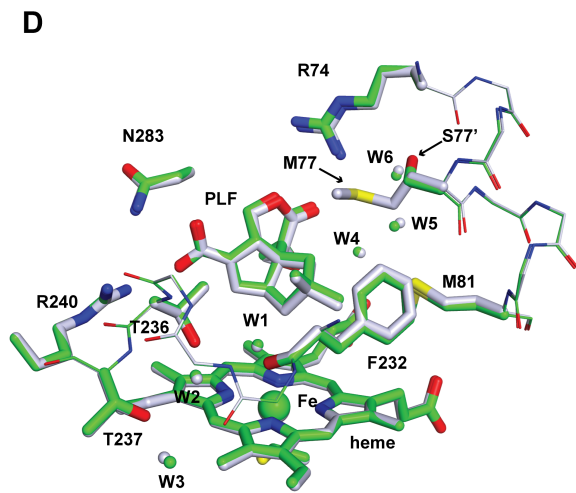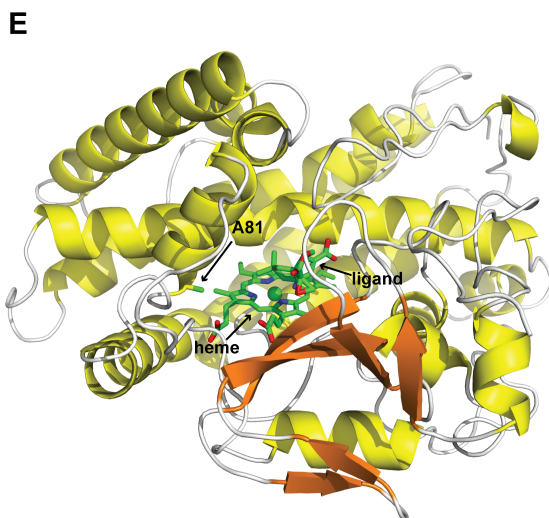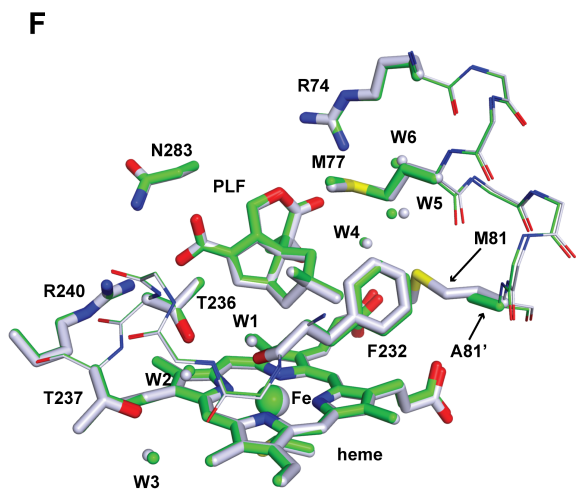



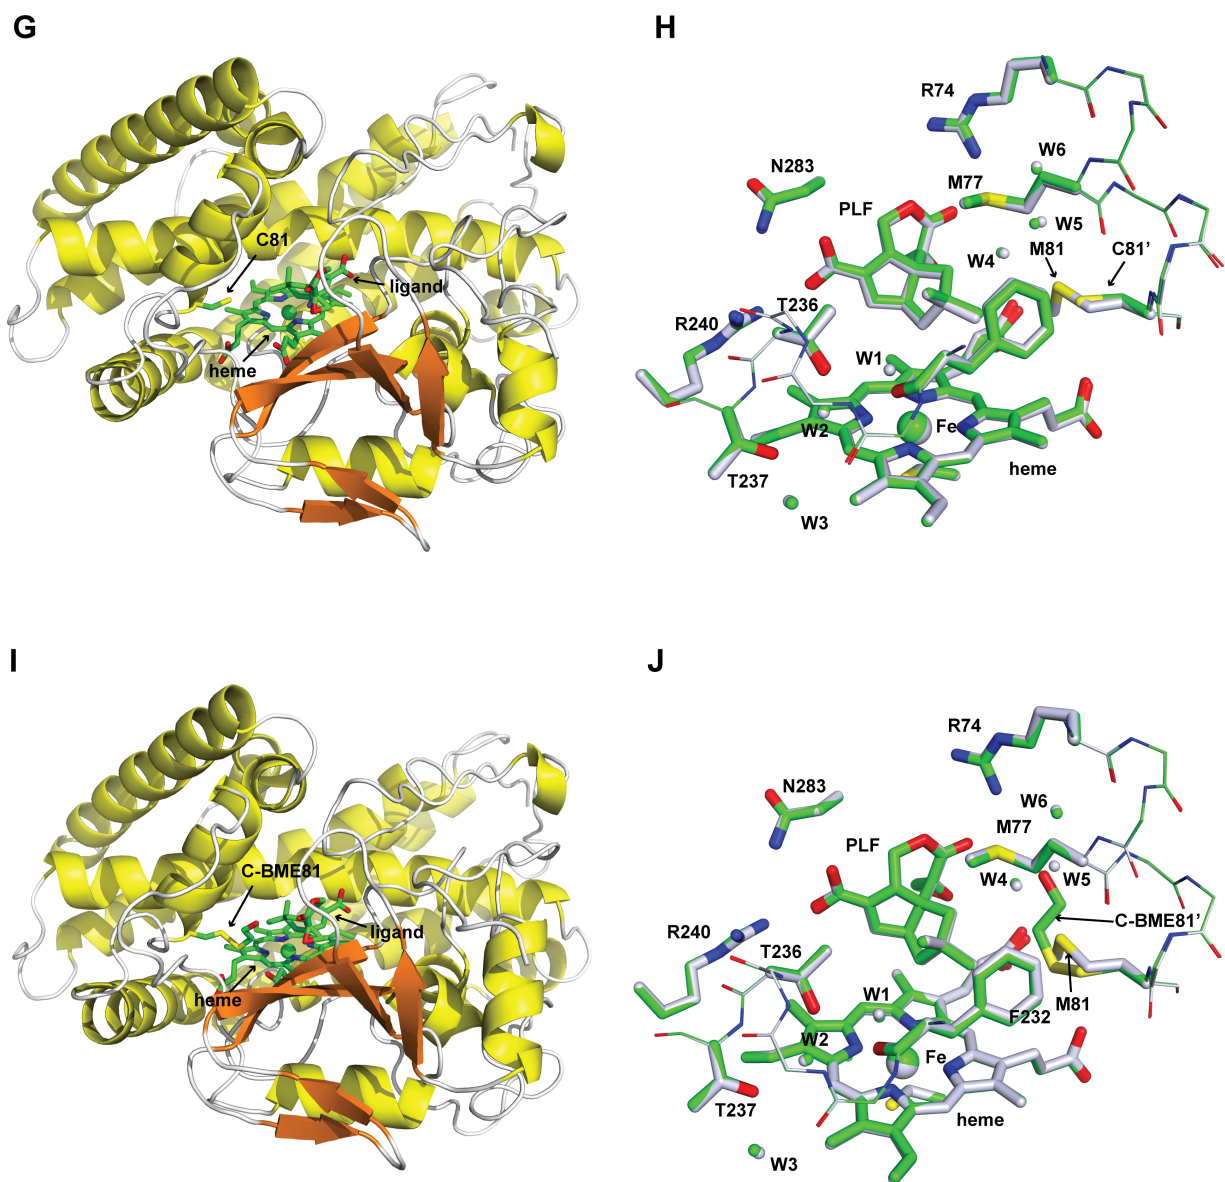

**Figure S11.** Structures of PntM mutants. **A**, overview structure of F232L with bound substrate **2**. Heme is shown as sticks with carbon atoms in green, heme  $\text{Fe}^{3+}$  is shown as a green sphere. The mutated residue L232 is shown as sticks with carbon atoms in green. **B**, comparison of the active site region of F232L with bound **2** and PntM with bound **2**. The relevant residues and water molecules of F232L with bound **2** are shown in green, while those for PntM with bound **2** are shown in white blue. The mutated residue in F232L is labeled as L232'. **C**, overview structure of M77S with bound substrate **2**. The mutated residue S77 is shown as sticks with carbon atoms in green. **D**, comparison of the active site region of M77S with bound **2** and PntM with bound **2**. The mutated residue in M77S is labeled as S77'. **E**, overview showing the structure of M81A with bound

substrate **2**. The mutated residue A81 is shown as sticks with carbon atoms in green. **F**, comparison of the active site region of M81A with bound **2** and PntM with bound **2**. Mutated residue in M81A is labeled as A81'. **G**, overview showing the structure of M81C with bound substrate **2**. The mutated residue C81 is shown as sticks with carbon atoms in green. **H**, comparison of the active site region of M81A with bound **2** and PntM with bound **2**. The mutated residue in M81C is labeled as C81'. **I**, overview showing the structure of M81C-BME with bound substrate **2**. The mutated residue C-BME81 is shown as sticks with carbon atoms in green. **J**, comparison of the active site region of M81C-BME with bound **2** and PntM with bound **2**. The mutated residue in M81C-BME is labeled as C-BME81'.
